# Supplementary material for: A cellulose monolithic stir bar for sorptive extraction of glycerol from biodiesel
Source: Royal Society of Chemistry journal article supplement (doi:10.1039/d4ra02985b), 2024-01-01
Supplement: d4ra02985b1.pdf [file d4ra02985b1.pdf]

## Cellulose monolithic stir bar for sorptive extraction of glycerol from biodiesel

Pablo H. S. Martins,<sup>a</sup> Maria A. Barros,<sup>a</sup> Caroline L. Silva,<sup>a</sup> Poliana Ricci,<sup>a</sup> Lais M. B. Castilho,<sup>a</sup> Allyson L. R. Santos,<sup>a</sup> Hugo S. Rodrigues,<sup>b</sup> Rosana M. N. Assunção,<sup>a,b</sup> Anizio M. Faria<sup>a\*</sup>

<sup>a</sup>Instituto de Química, Universidade Federal de Uberlândia, 38304-402 Ituiutaba, MG, Brazil.

<sup>b</sup>Instituto de Ciências Exatas e Naturais do Pontal, Universidade Federal de Uberlândia, 38304-402 Ituiutaba, MG, Brazil.

[pablo0phsm@gmail.com](mailto:pablo0phsm@gmail.com), [cidabarro\\_154@yahoo.com.br](mailto:cidabarro_154@yahoo.com.br), [caroline.lopes@ufu.br](mailto:caroline.lopes@ufu.br),

[ricci.poliana@gmail.com](mailto:ricci.poliana@gmail.com), [lais.bife@hotmail.com](mailto:lais.bife@hotmail.com), [leandroallyson@hotmail.com](mailto:leandroallyson@hotmail.com), [hsrodrigues@ufu.br](mailto:hsrodrigues@ufu.br),

[rosana.assuncao@ufu.br](mailto:rosana.assuncao@ufu.br), [anizio@ufu.br](mailto:anizio@ufu.br)

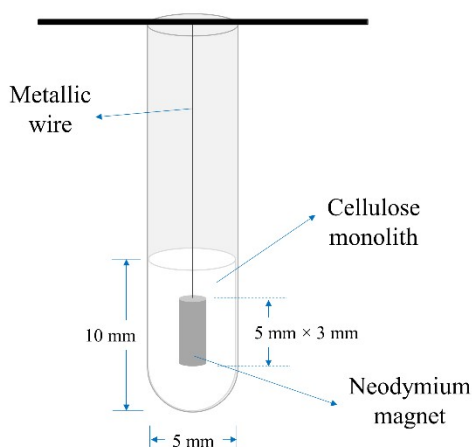

Figure S1. Illustration of the preparation of cellulose monolith stir bar.

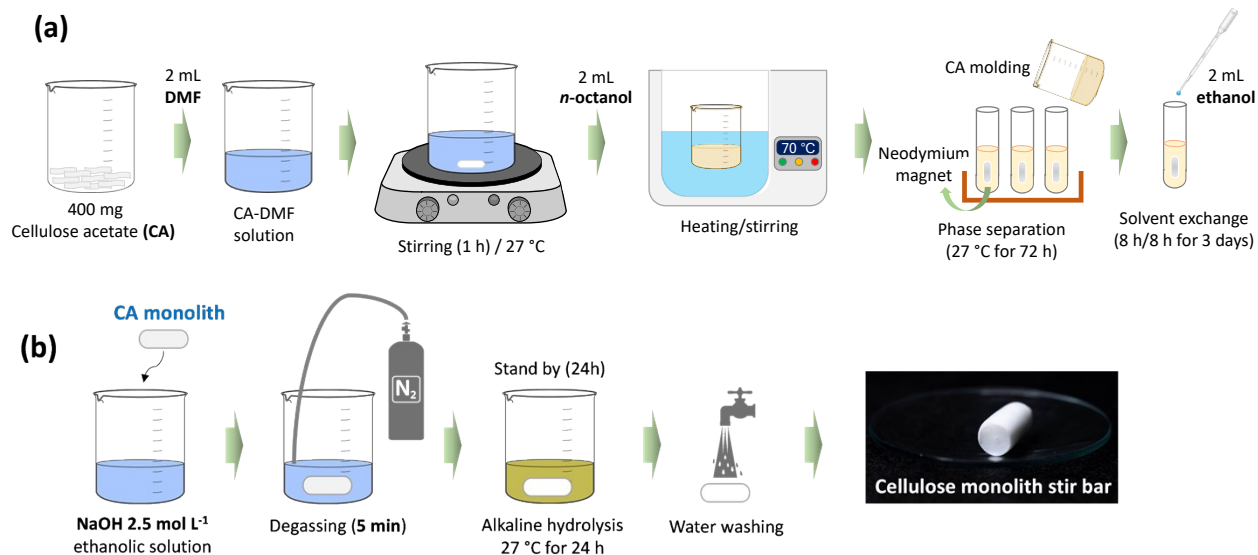

Figure S2. Preparation sketch of the (a) cellulose acetate and (b) cellulose monolith sorptive stir bars.

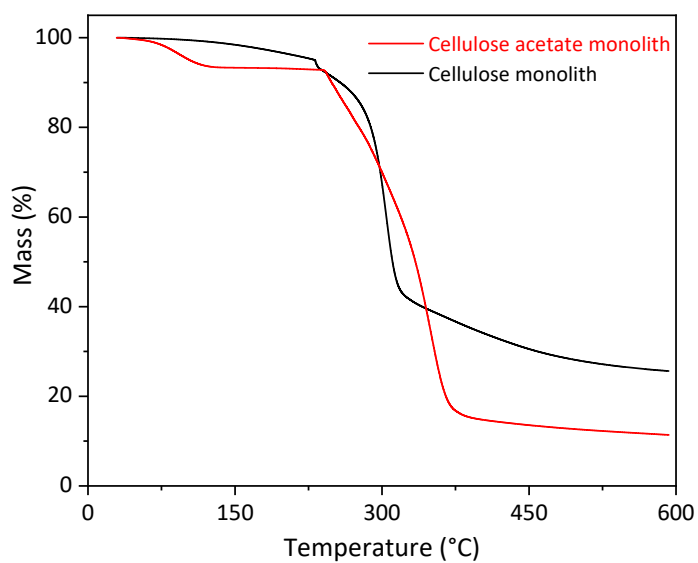

Figure S3. TG curves for the cellulose acetate and cellulose monoliths.

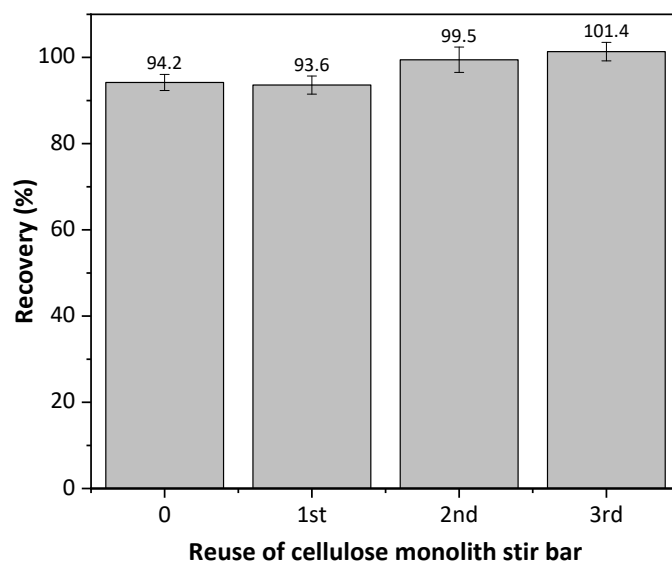

Figure S4. Reuse of monolithic cellulose stir bars in the extraction of glycerol from biodiesel samples by the optimized SBSE method and HPLC-RID analysis.

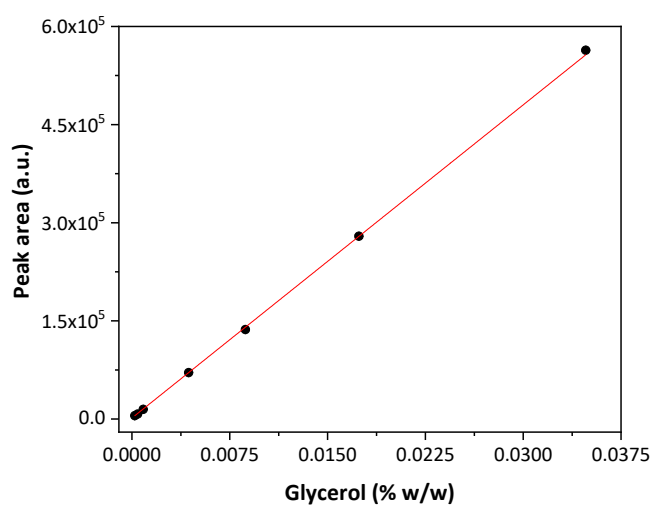

Figure S5. The analytical curve for free glycerol aqueous solution was used using the SBSE-HPLC-RID method with a cellulose monolith stir bar.

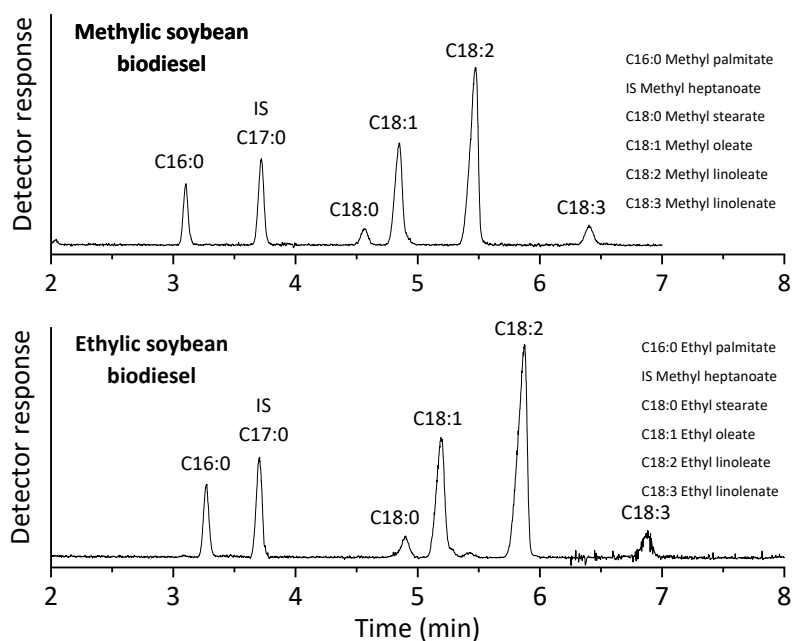

Figure S6. Chromatogram of fatty acid (a) methyl and (b) ethyl esters from methylic and ethylic soybean biodiesel, respectively. Conditions: Capillary column Carbowax 20M bonded 30 m × 0.32 mm ID × 0.25  $\mu\text{m}$   $d_f$ ; Column temperature: 190  $^{\circ}\text{C}$ ; Carrier gas: Helium; Flow rate: 1.0 mL  $\text{min}^{-1}$ ; Injection temperature: 250  $^{\circ}\text{C}$ ; Split ratio: 1:50; Flame ionization detector: 250  $^{\circ}\text{C}$ .

Table S1. Characterization of biodiesel (B100) samples.

| Biodiesel<br>(B100)<br>samples              | Composition (%) |       |       |       |       | Total FA <sup>a</sup> esters<br>(% w/w) |
|---------------------------------------------|-----------------|-------|-------|-------|-------|-----------------------------------------|
|                                             | C16:0           | C18:0 | C18:1 | C18:2 | C18:3 |                                         |
| Methylic<br>soybean                         | 10.1            | 4.1   | 27.9  | 52.3  | 5.6   | 99.3                                    |
| Ethylic<br>soybean                          | 10.4            | 4.3   | 28.4  | 51.4  | 5.5   | 99.0                                    |
| EN14214 specifications (% w/w) <sup>1</sup> |                 |       |       |       | < 12  | > 96.5                                  |

<sup>a</sup> FA: Fatty acid

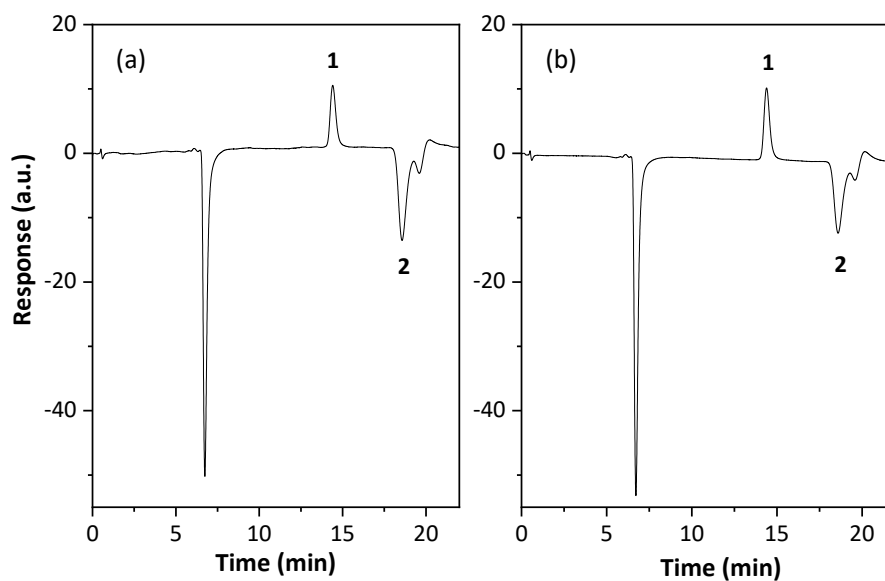

Figure S7. Chromatograms of (a) methylic and (b) ethylic biodiesel extracts obtained by SBSE method using the CMSB. Conditions: Aminex HPX-87H column (300 mm  $\times$  7.6 mm ID, 9  $\mu$ m particle size, 8 % cross-linkage) at 35  $^{\circ}$ C; Mobile phase: 5.0 mmol L<sup>-1</sup> H<sub>2</sub>SO<sub>4</sub>, flow rate 0.6 mL min<sup>-1</sup>; refractive index detector at 35  $^{\circ}$ C. Peak identifications: 1- glycerol, 2- fatty acid esters.

## References

- 1 EN14214. Automotive fuels—fatty acid methyl esters (FAME) for diesel engines—requirements and test methods. Berlin, Germany: Beuth-Verlag, 2003.
